# Supplementary material
Source: Springer Nature journal article supplement (https://www.springermedizin.de/resource/supplementary/12967_2013_1678_MOESM4_ESM.pdf/9574632)

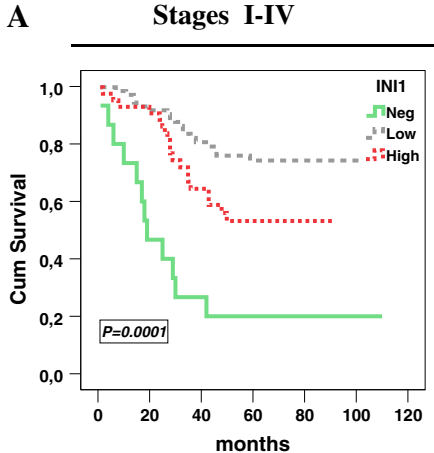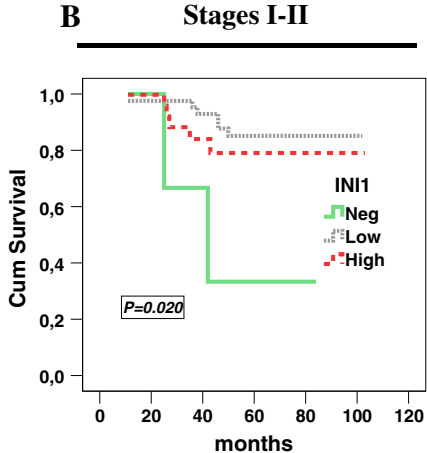

**C**

| MMR (+) cases |     |                        |            | MMR (-) cases |                        |           |
|---------------|-----|------------------------|------------|---------------|------------------------|-----------|
| INI1          | n   | Mean Survival (months) | 95% (CI)   | n             | Mean Survival (months) | 95% (CI)  |
| Neg           | 9   | 15.1                   | 1.1-28.9   | 6             | 23.3                   | 10.5-36.1 |
| Low           | 58  | 93.3                   | 82.1-104.5 | 17            | 82.0                   | 73.3-90.5 |
| High          | 36  | 40.4                   | 27.3-53.4  | 8             | 55.1                   | 45.1-65.2 |
| Overall       | 103 | 66.8                   | 61.0-90.4  | 31            | 78.2                   | 61.5-79.6 |

Supplement: MOESM4 [file 9574632]
